# Supplementary material for: Multiplexed chemostat system for quantification of biodiversity and ecosystem functioning in anaerobic digestion
Source: PLOS journal article supplement (doi:10.1371/journal.pone.0193748), 2018-03-08
Supplement: S1 (10.1371/journal.pone.0193748.s001) [file journal.pone.0193748.s001]

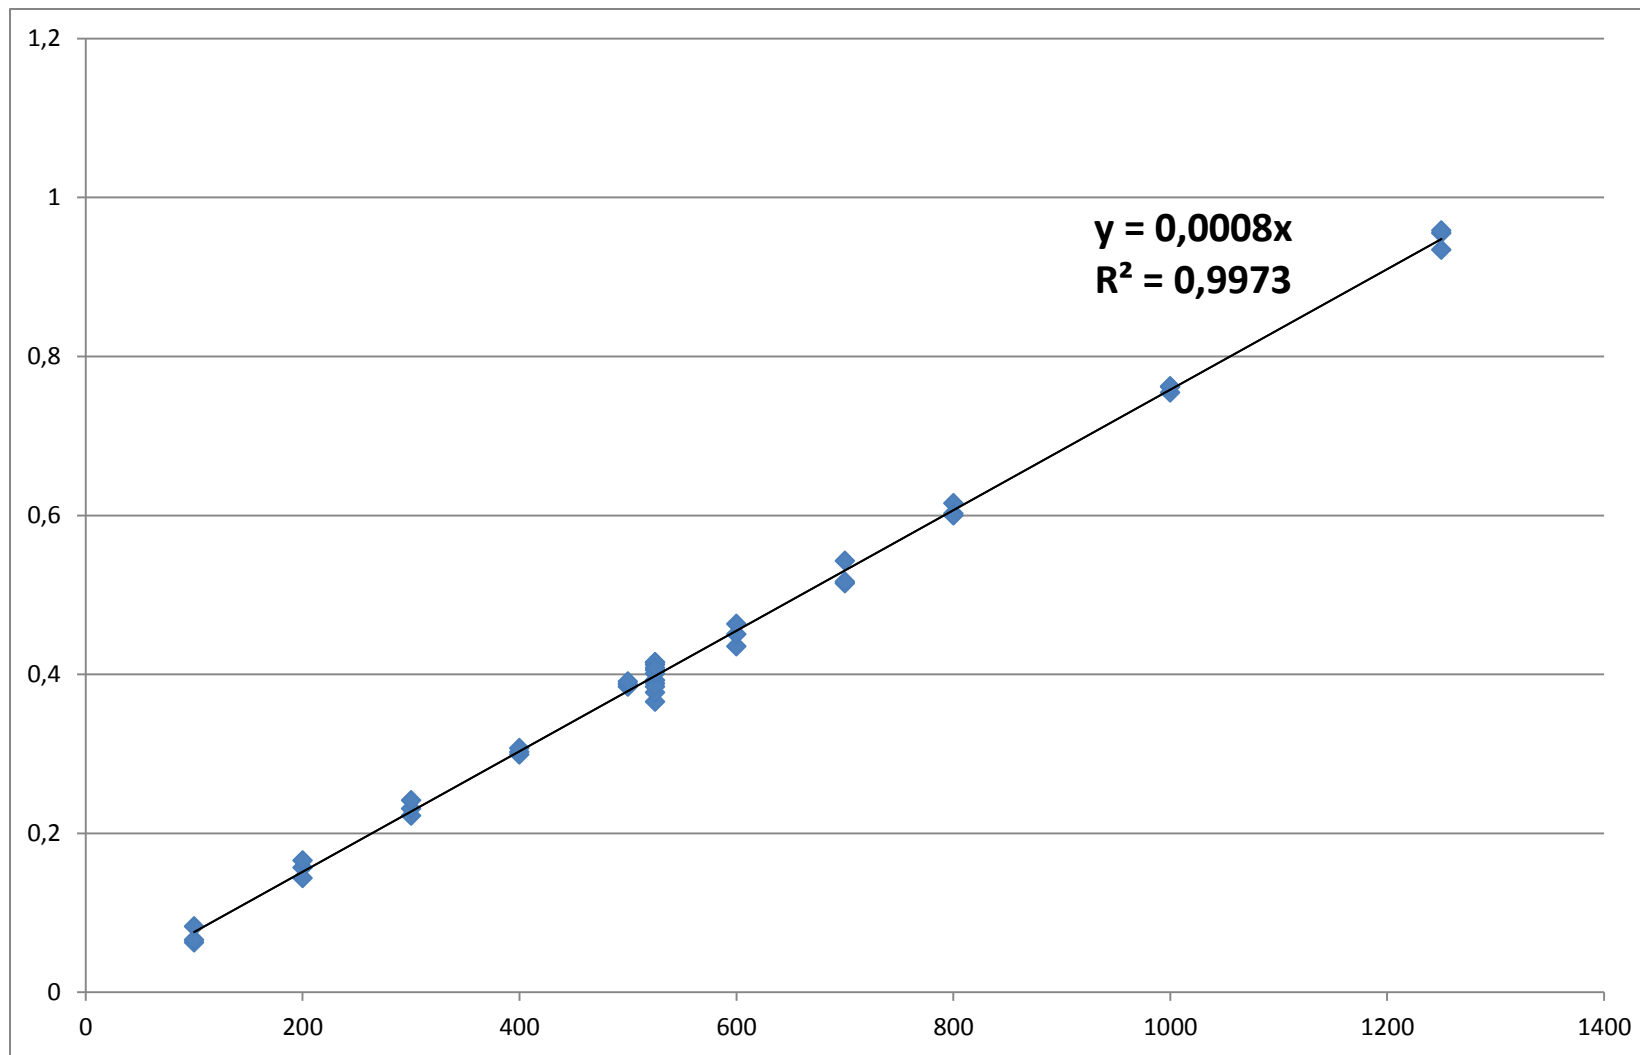

**S1 Fig. Calibration of one peristaltic pump.** The calibration was made with measuring different volumes of water after having rotated the pump one minute at different velocities.
