# Supplementary material for: Multiplexed chemostat system for quantification of biodiversity and ecosystem functioning in anaerobic digestion
Source: PLOS journal article supplement (doi:10.1371/journal.pone.0193748), 2018-03-08
Supplement: S8 (10.1371/journal.pone.0193748.s008) [file journal.pone.0193748.s008]

| Week | INOC A        | INOC B        | INOC C        | Chi-2  | p-value | pairwise comparison                |
|------|---------------|---------------|---------------|--------|---------|------------------------------------|
| 1    | 110.1 ± 39.5  | 177.9 ± 107.5 | 249.2 ± 163.0 | 32.96  | 6.9e-08 | INOC A different from INOC B and C |
| 2    | 265.9 ± 144.9 | 331.0 ± 177.3 | 327.0 ± 107.8 | 18.49  | 9.7e-05 | INOC A different from INOC B and C |
| 3    | 217.9 ± 106.8 | 85.8 ± 42.8   | 270.9 ± 34.4  | 199.57 | 2.2e-16 | All pairwise different             |
| 4    | 141.2 ± 109.1 | 48.3 ± 47.0   | 116.9 ± 42.5  | 108.04 | 2.2e-16 | INOC B different from INOC A and C |
| 5    | 40.8 ± 16.8   | 29.9 ± 7.5    | 114.8 ± 34.9  | 237.43 | 2.2e-16 | All pairwise different             |
| 6    | 82.8 ± 39.5   | 37.7 ± 10.8   | 92.4 ± 22.3   | 179.52 | 2.2e-16 | All pairwise different             |
| 7    | 163.3 ± 72.5  | 113.7 ± 61.7  | 174.5 ± 66.5  | 48.87  | 2.5e-11 | All pairwise different             |
| 8    | 175.2 ± 78.3  | 200.7 ± 75.9  | 233.3 ± 57.9  | 37.75  | 6.3e-09 | INOC C different from INOC A and B |
| 9    | 243.9 ± 69    | 268.2 ± 123.4 | 257.9 ± 38.6  | 3.34   | 0.1886  | -                                  |

**S3 Table. Comparison of biogas production rates.** Four replicated reactors were used. Mean biogas production rates are expressed over the organic loading rate (ml·gCOD<sup>-1</sup>). Kruskal Wallis tests (Chi<sup>2</sup>) were performed. When the test was significant (p-value < 0.05), the Dunn post-hoc test was applied to account for multiple comparisons of independent samples.
